# Supplementary material
Source: PubMed Central journal article supplement (PMC2886978)

**Supporting Information for: *Ex Vivo***  
**Oxidation in Tissue and Plasma Assays of**  
**Hydroxyoctadecadienoates: (*Z,E/E,E*)-**  
**Stereoisomer Ratios**

Wei Liu,<sup>a</sup> Huiyong Yin,<sup>a</sup> Yoko Ogawa Akazawa,<sup>b</sup> Yasukazu Yoshida,<sup>b</sup> Etsuo Niki<sup>b</sup> and Ned A. Porter<sup>a\*</sup>

<sup>a</sup>Department of Chemistry and Vanderbilt Institute of Chemical Biology, Vanderbilt University, Nashville, Tennessee 37235

<sup>b</sup>Health Technology Research Center, National Institute of Advanced Industrial Science & Technology, 1-8-31 Midorigaoka, Ikeda, Osaka 563-8577, Japan

Figure S5. <sup>1</sup>H NMR (500 MHz, CDCl<sub>3</sub>) for Compound 4.

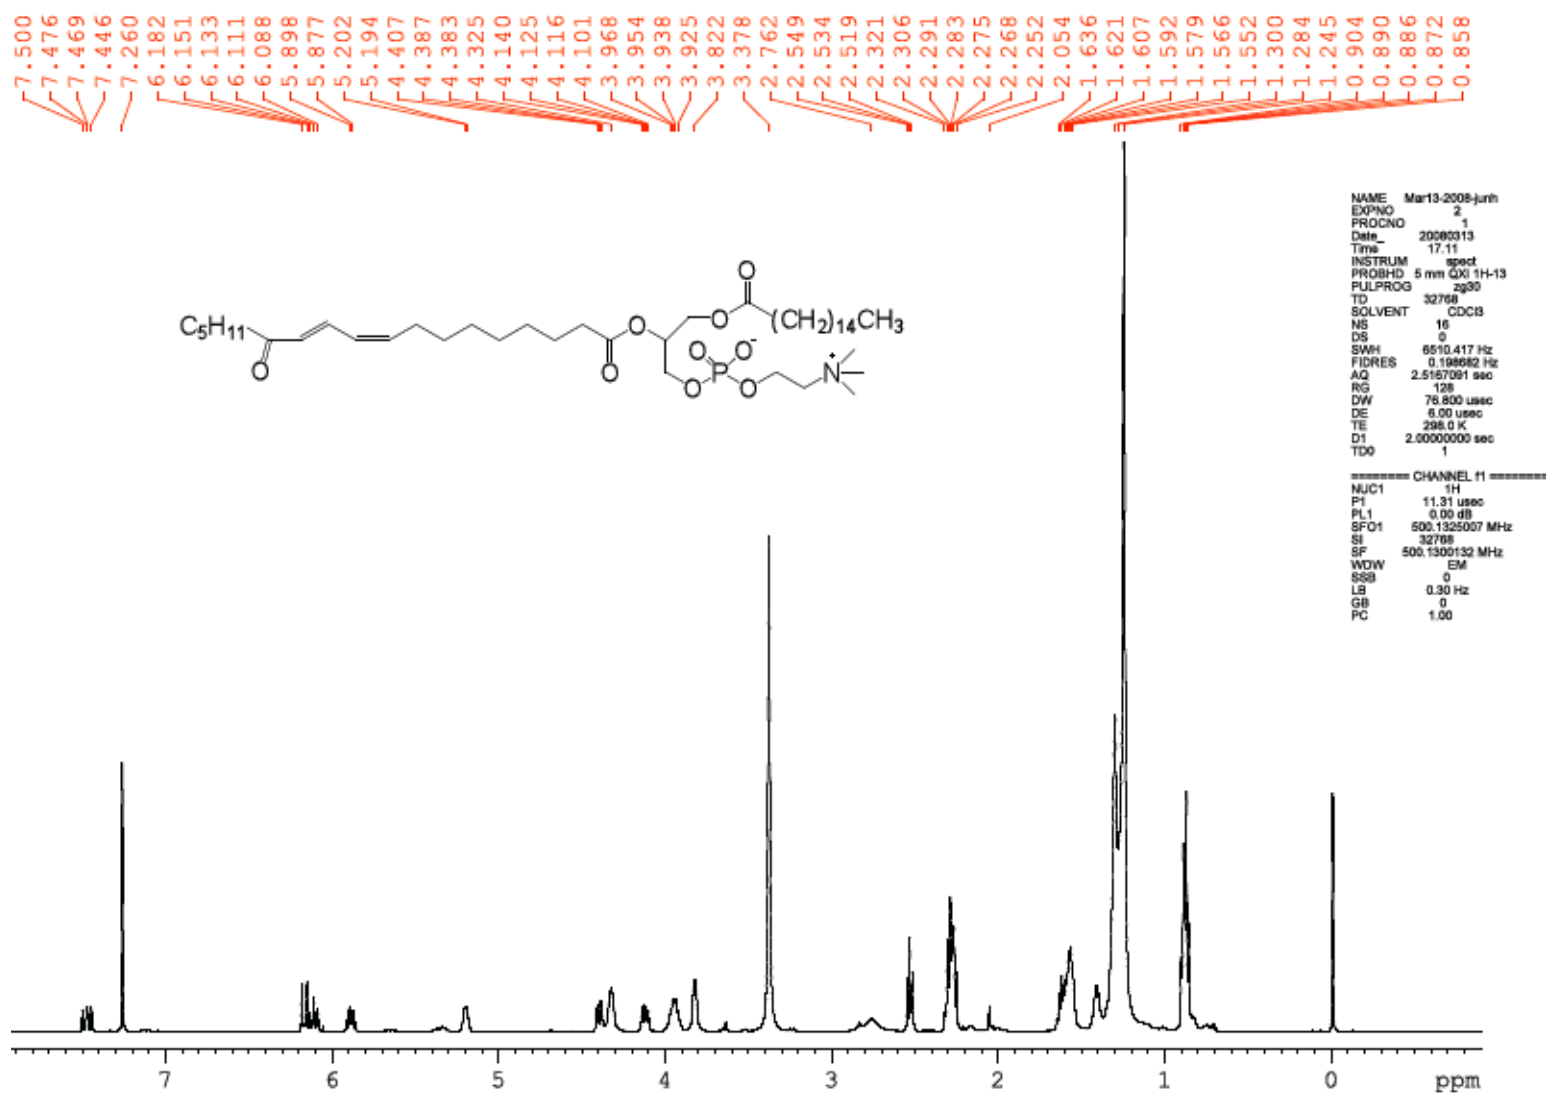

δ 7.47 (dd,  $J = 15.3, 11.6$  Hz, 1H), 6.20 – 6.04 (m, 2H), 5.89 (dd,  $J = 18.3, 7.9$  Hz, 1H), 5.20 (d,  $J = 3.8$  Hz, 1H), 4.44 – 4.36 (m, 1H), 4.33 (s, 2H), 4.12 (dd,  $J = 11.9, 7.2$  Hz, 1H), 4.01 – 3.87 (m, 2H), 3.82 (s, 2H), 3.38 (s, 9H), 2.87 – 2.66 (m, 2H), 2.53 (dd,  $J = 13.6, 6.1$  Hz, 2H), 2.35 – 2.22 (m, 6H), 1.68 – 1.50 (m, 6H), 1.40 (m, 2H), 1.27 (m, 31H), 0.93 – 0.82 (m, 6H).

Figure S6. Typical LC-MS/MS chromatogram for CCl<sub>4</sub> rat liver reduced with triphenylphosphine

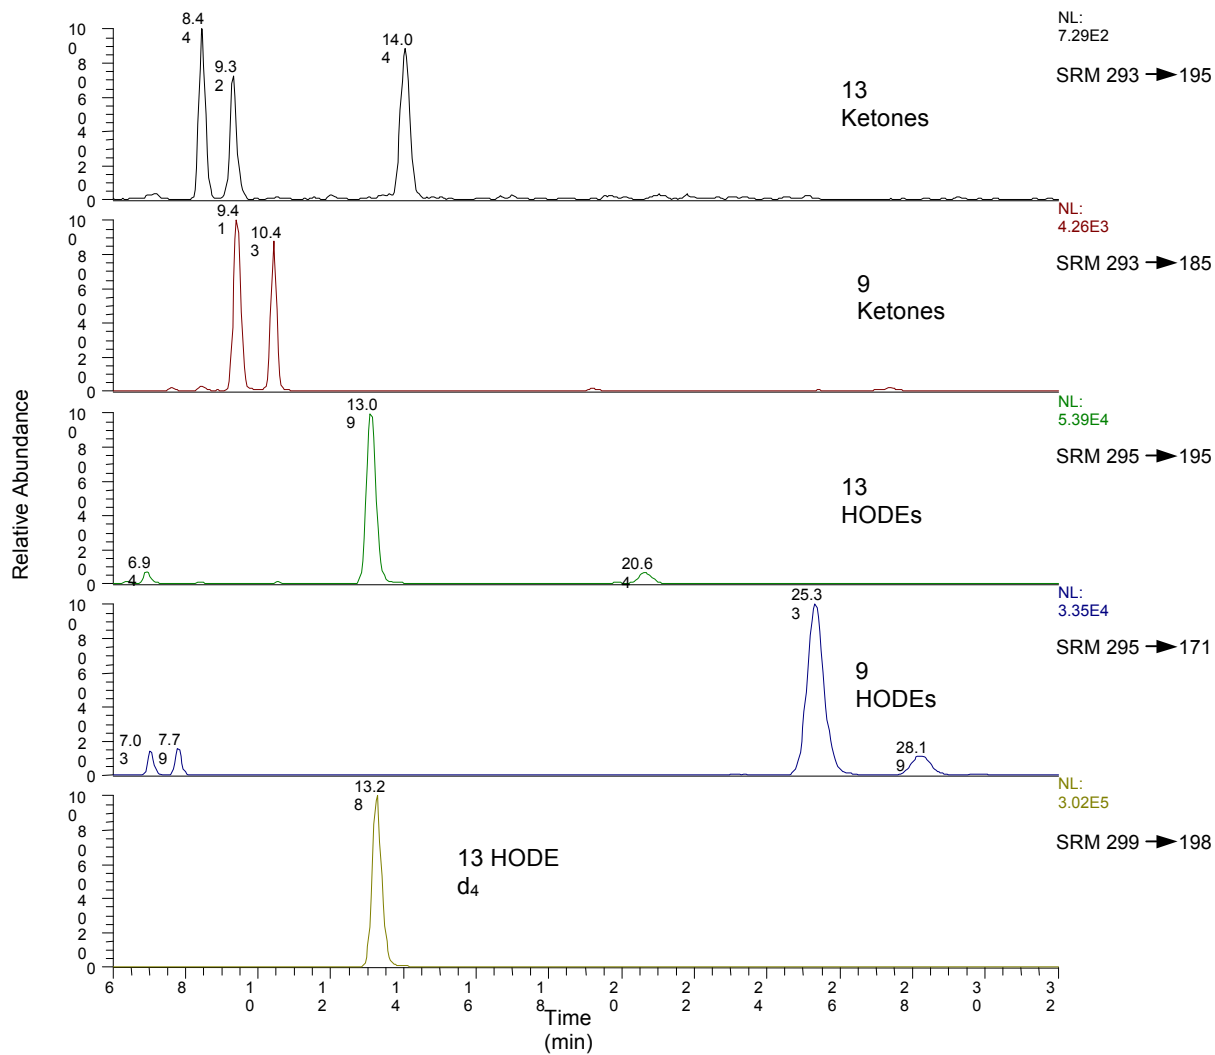

Figure S7. Typical LC-MS/MS chromatogram for CCl<sub>4</sub> rat liver reduced with NaBH<sub>4</sub>.

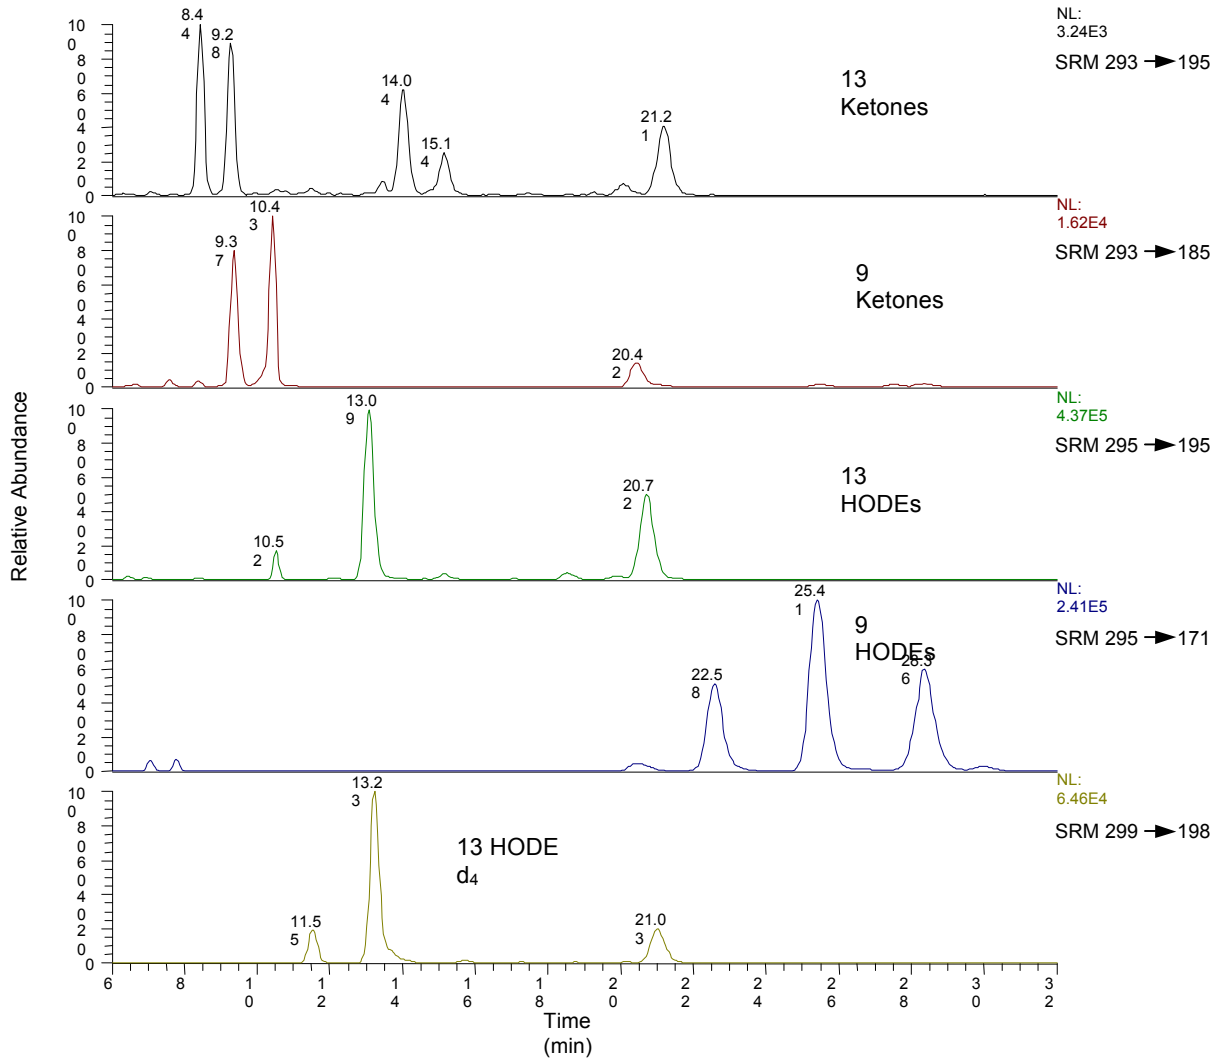

**Figure S8.** Typical LC-MS/MS chromatogram for human plasma reduced with triphenylphosphine.

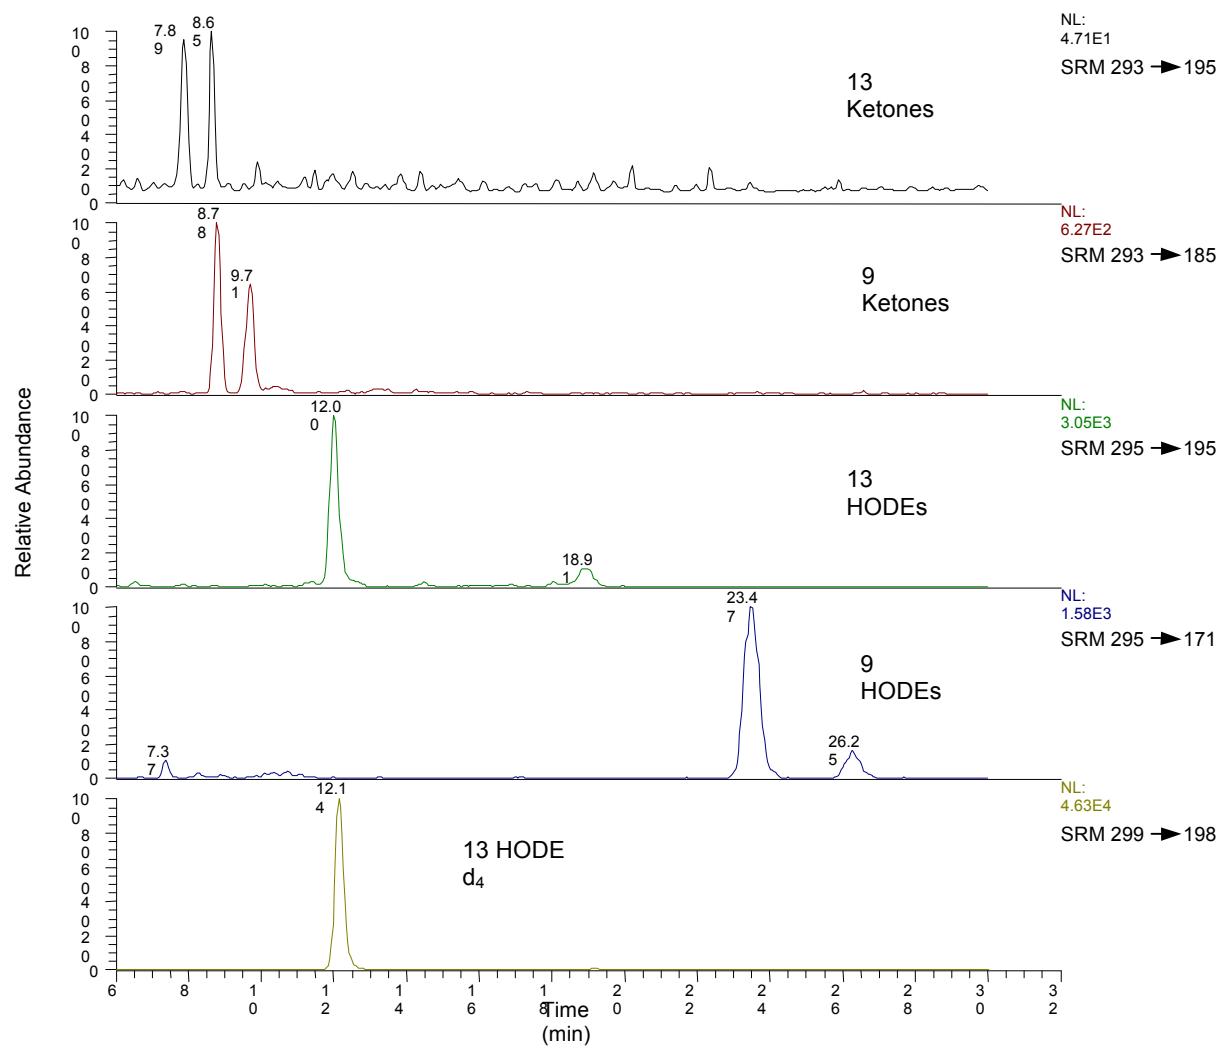

**Figure S9.** Typical LC-MS/MS chromatogram for human plasma reduced with NaBH<sub>4</sub>

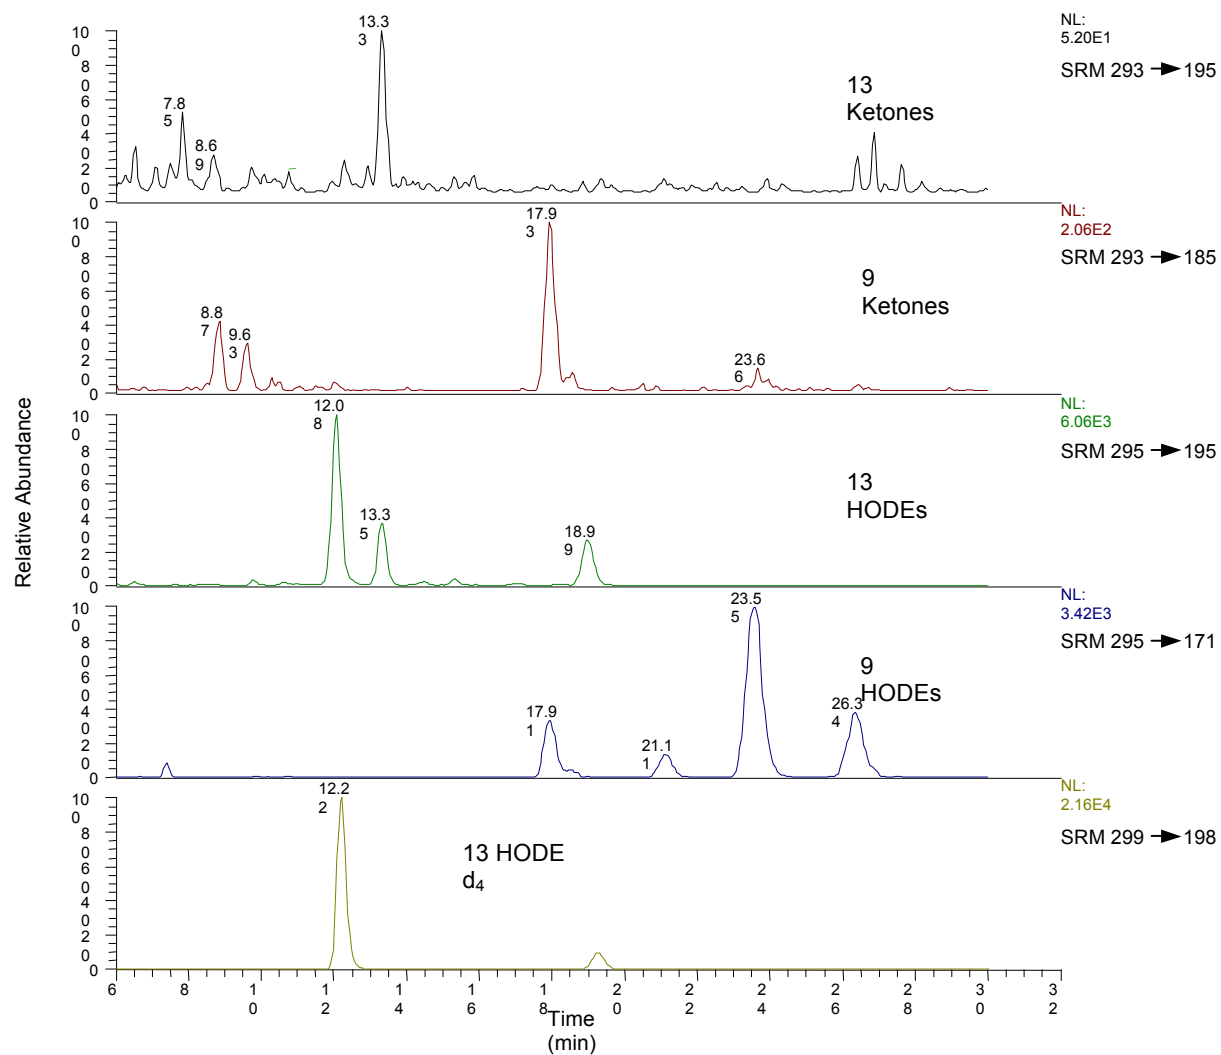

Supplement: NIHMS200353-supplement-1_si_001.pdf [file NIHMS200353-supplement-1_si_001.pdf]
